# Supplementary material for: Core-Fucosylated Tetra-Antennary N-Glycan Containing A Single N-Acetyllactosamine Branch Is Associated with Poor Survival Outcome in Breast Cancer
Source: PubMed Central journal article supplement (PMC6566954; doi:10.3390/ijms20102528), 2019-05-23
Supplement: ijms-20-02528-s001.pdf [file ijms-20-02528-s001.pdf]

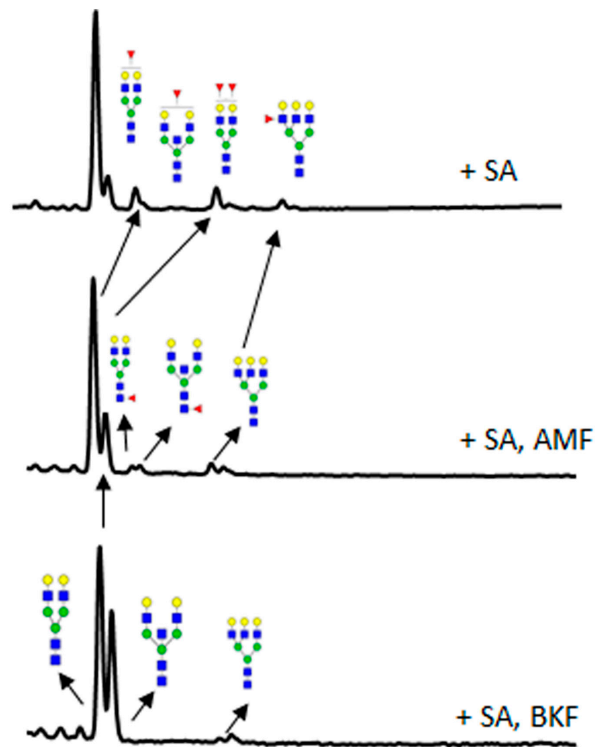

**Supplemental Figure 1.** Ceruloplasmin protein control for testing  $\alpha$ 1-2,3,4- fucosidase (outer arm) almond meal fucosidase (AMF) and all fucose linkages including  $\alpha$ 1,6-fucose (core) bovine kidney fucosidase (BKF), to show AMF cleaved 7% of outer arm fucose and BKF cleaved remaining 14% core fucose on this standard protein.

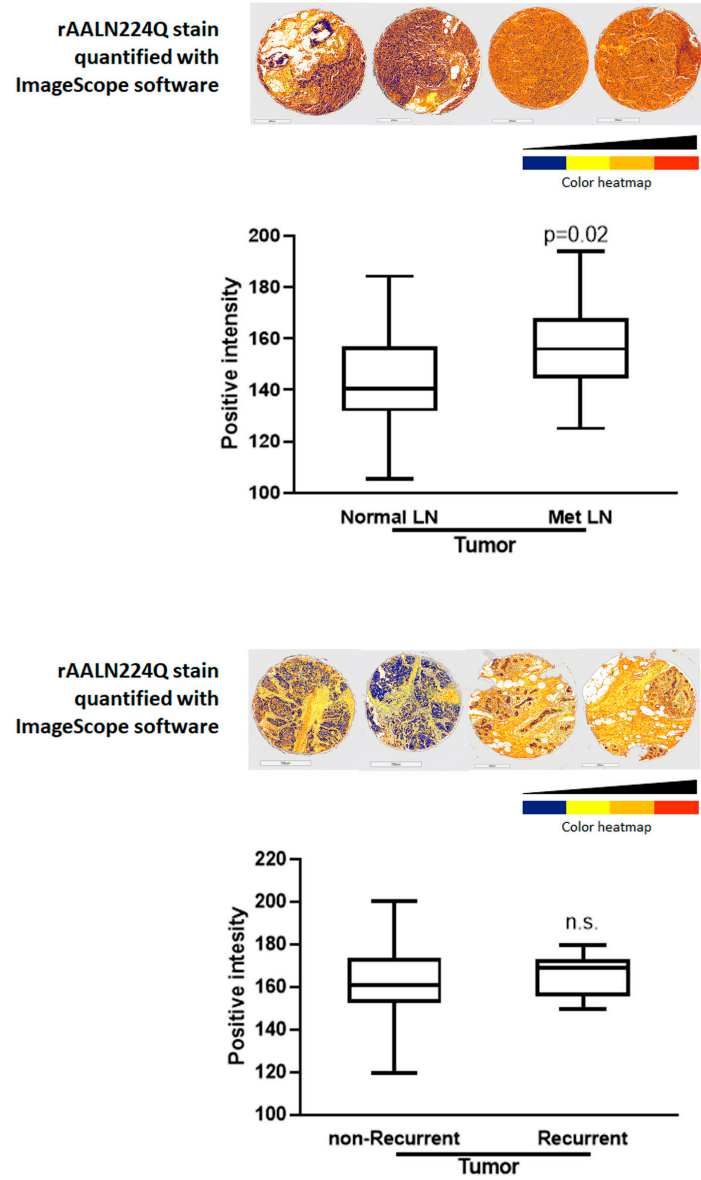

**Supplemental Figure 2.** Quantitation of positive rAALN224Q staining from the TMA shown in Figures 4C and 5.

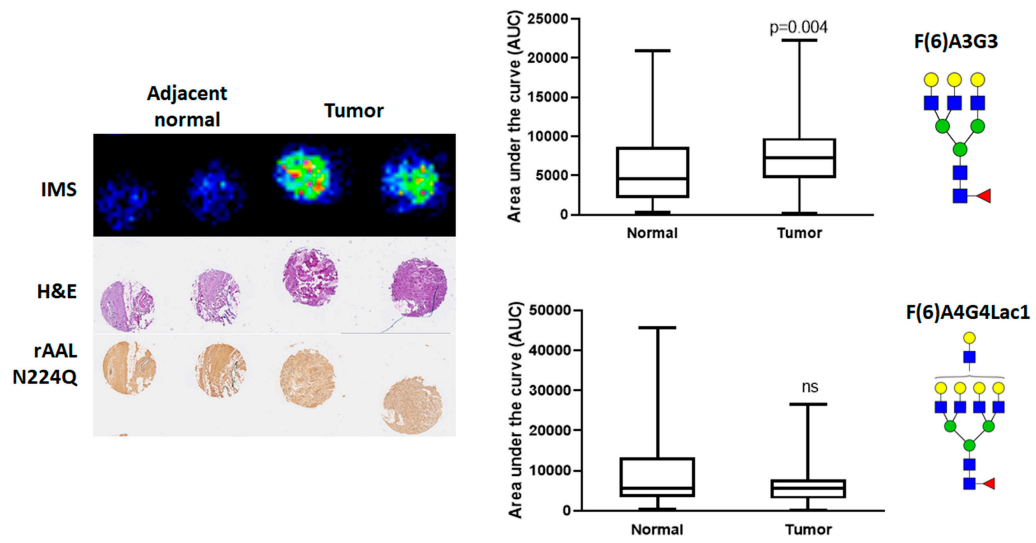

**Supplemental Figure 3.** Quantification of F(6)A3G3 and F(6)A4G4Lac1 in adjacent normal tissue compared to tumor tissue from the TMA shown in Figures 4C and 5.
